# Supplementary material for: Effectiveness of blood pressure-lowering drug treatment by levels of absolute risk: post hoc analysis of the Australian National Blood Pressure Study
Source: PubMed Central journal article supplement — BMJ Open. 2018 Mar 19;8(3):e017723. doi: 10.1136/bmjopen-2017-017723 (PMC5875665; doi:10.1136/bmjopen-2017-017723), 2018-03-19
Supplement: bmjopen-2017-017723supp001.pdf [file bmjopen-2017-017723supp001.pdf]

Table 1. Baseline characteristics stratified by tertile of baseline systolic blood pressure

| Group variable            | 1 <sup>st</sup> tertile<br>(113-151 mmHg) | 2 <sup>nd</sup> tertile<br>(152 – 165 mmHg) | 3 <sup>rd</sup> tertile<br>(166 – 225 mmHg) |
|---------------------------|-------------------------------------------|---------------------------------------------|---------------------------------------------|
| Sample, N                 | 1156                                      | 1014                                        | 1074                                        |
| Age, years                | 48.8 ± 7.3                                | 51.4 ± 7.8                                  | 55.1 ± 7.8                                  |
| Male sex, N (%)           | 803 (69.5)                                | 645 (63.6)                                  | 569 (53.0)                                  |
| Current smoker, N (%)     | 285 (24.7)                                | 251 (24.8)                                  | 265 (24.7)                                  |
| SBP, mmHg                 | 142.1 ± 7.0                               | 158.2 ± 3.9                                 | 179.3 ± 11.7                                |
| DBP, mmHg                 | 99.7 ± 4.1                                | 102.7 ± 6.0                                 | 106.5 ± 8.0                                 |
| Total cholesterol, mmol/l | 5.9 ± 1.1                                 | 6.0 ± 1.1                                   | 6.1 ± 1.2                                   |
| BMI, kg/m <sup>2</sup>    | 26.7 ± 3.6                                | 26.5 ± 3.7                                  | 26.6 ± 4.4                                  |
| CVD risk (%)              | 7.9 ± 8.7                                 | 12.8 ± 9.6                                  | 20.7 ± 9.5                                  |

SBP: systolic blood pressure, DBP: diastolic blood pressure, BMI: body - mass index, CVD: cardiovascular disease.

Table 2. Effect of treatment by tertile of baseline systolic blood pressure.

|                            | Event (%) |           | Adjusted HR<br>(95% CI)* | ARR %<br>(95% CI)     | NNT                 |
|----------------------------|-----------|-----------|--------------------------|-----------------------|---------------------|
|                            | Active    | Placebo   |                          |                       |                     |
| <b>Any event</b>           |           |           |                          |                       |                     |
| 113-151 mmHg               | 34 (5.6)  | 43 (7.8)  | 0.71 (0.45 -1.11)        | 2.5 (-0.7,5.6)        | 41 (-135, 18)       |
| 152 – 165 mmHg             | 49 (9.8)  | 46 (9.0)  | 1.07 (0.71 - 1.61)       | -1.2 (-5.0, 2.7)      | -87 (-20, 37)       |
| 166 – 225 mmHg             | 54 (10.5) | 76 (3.6)  | 0.73 (0.51-1.03)         | <b>4.8 (0.9, 8.8)</b> | <b>21 (11, 112)</b> |
| p-value                    | -         | -         | 0.25                     | 0.1                   | -                   |
| <b>All-cause mortality</b> |           |           |                          |                       |                     |
| 113-151 mmHg               | 5 (0.8)   | 10 (1.8)  | 0.49 (0.17-1.46)         | 0.7 (-0.2, 1.7)       | 139 (-468, 60)      |
| 152 – 165 mmHg             | 11 (2.2)  | 8 (1.6)   | 1.30 (0.51 - 3.28)       | -0.9 (-2.7, 0.9)      | -110 (-36, 108)     |
| 166 – 225 mmHg             | 9 (1.7)   | 15 (2.7)  | 0.64 (0.28 - 1.46)       | <b>1.9 (0.3, 3.6)</b> | <b>52 (28, 372)</b> |
| p – value                  | -         | -         | 0.26                     | 0.08                  | -                   |
| <b>Non-fatal event</b>     |           |           |                          |                       |                     |
| 113-151 mmHg               | 29 (4.8)  | 33 (6.0)  | 0.77 (0.47 - 1.28)       | 1.2 (-1.7, 1.5)       | 86 (-59, 25)        |
| 152 – 165 mmHg             | 38 (7.6)  | 38 (7.4)  | 1.00 (0.63 - 1.58)       | -0.2 (-3.6, 1.7)      | -455 (-27, 31)      |
| 166 – 225 mmHg             | 45 (8.7)  | 61 (10.9) | 0.76 (0.52 - 1.13)       | 2.9 (-0.8, 1.8)       | 35 (-133, 15)       |
| p – value                  | -         | -         | 0.58                     | 0.48                  | -                   |
| <b>Major CVD event</b>     |           |           |                          |                       |                     |
| 113-151 mmHg               | 31 (5.1)  | 35 (6.3)  | 0.79 (0.48 - 1.28)       | 1.6 (-1.3, 1.5)       | 61 (-74, 22)        |
| 152 – 165 mmHg             | 41 (8.2)  | 40 (7.8)  | 1.04 (0.67 - 1.61)       | -0.4 (-4.0; 3.1)      | -227 (-25, 32)      |
| 166 – 225 mmHg             | 45 (8.7)  | 65 (11.7) | 0.73 (0.50 - 1.06)       | <b>4.1 (0.4, 7.8)</b> | <b>24 (13, 242)</b> |
| p - value                  | -         | -         | 0.39                     | 0.22                  | -                   |
| <b>Any CHD</b>             |           |           |                          |                       |                     |
| 113-151 mmHg               | 30 (5.0)  | 29 (5.3)  | 0.93 (0.56 - 1.56)       | 0.4 (-2.4, 3.1)       | 286 (-42, 32)       |
| 152 – 165 mmHg             | 29 (5.8)  | 30 (5.9)  | 0.95 (0.57-1.59)         | -0.1 (-3.1, 2.9)      | -1250 (-32, 34)     |
| 166 – 225 mmHg             | 38 (7.4)  | 47 (8.4)  | 0.87 (0.57-1.34)         | 2.0 (-1.4, 5.4)       | 51 (-71, 19)        |
| p - value                  | -         | -         | 0.89                     | 0.65                  | -                   |

CVD: cardiovascular disease, CHD: coronary heart disease, HR: hazard ratio, CI: confidence interval, ARD: absolute risk difference, NNT: number needed to treat. NNTB: number needed to treat (benefit). NNTH: number needed to treat (harm).p-value indicated p for interaction.

\* Adjusted for age, sex, body-mass index, smoking, screening centres and systolic blood pressure.

**Bold** p<0.05
